# Supplementary material
Source: ML conference proceedings conference paper supplement (https://openaccess.thecvf.com/content/ICCV2023/html/Han_Dynamic_Perceiver_for_ICCV_2023_paper.html)
Supplement: Supplementary file 1 [file Han_Dynamic_Perceiver_for_ICCV_2023_supplemental.pdf]

## Appendix

We provide more details of our experiments, including the configuration of all models reported in the main text (Appendix A) and the training setup (Appendix B). We also provide the speed test results of Dyn-Perceiver implemented on ResNet (Appendix C).

### A. Model Configuration

In Fig. 8 and Fig. 9, we reported the results of different-sized Dyn-Perceiver. Here we list the detailed configuration of Dyn-Perceiver implemented on ResNet (Tab. 5), RegNet-Y (Tab. 6) and MobileNet-v3 (Tab. 7). SA is the abbreviation of self-attention.

### B. Training Settings

**Image classification.** The training settings of Dyn-Perceiver are demonstrated in Tab. 8. For simplicity, we use the same settings to train MobileNet-based models and the ResNet/RegNet-based models, except for the training epochs. For each experiment, we select batch size from {1024, 2048} based on model sizes and the GPU memory. **Action recognition.** We use the TSM [34] code base<sup>2</sup> and add temporal shift to our latent code  $\mathbf{Z}$  in self-attention blocks. We follow the settings in the official implementation and sum up the classification loss from different exits with the same weights as in ImageNet training.

**Object detection.** We finetune the ImageNet-pretrained checkpoints on COCO for 12 epochs following the official settings of RetinaNet [36] in the MMDetection code base<sup>3</sup>. Since the feature maps from different stages are required by the detection head, we do not perform early exiting here, and the experiment is only to demonstrate the capability of Dyn-Perceiver to serve as a detection backbone.

### C. Speed Test for ResNet-based Model

We also test the practical efficiency of our smallest ResNet-based Dyn-Perceiver (model 1 in Tab. 5) on the desktop i5 CPU and the A100 GPU. The latency-accuracy curves on CPU and GPU are presented in Fig. 13a and Fig. 13b, respectively. It could be observed that Dyn-Perceiver achieves satisfying speedup on the two devices when achieving the same accuracy with the baseline.

<sup>2</sup><https://github.com/mit-han-lab/temporal-shift-module>.

<sup>3</sup><https://www.github.com/open-mmlab/mmdetection>.

| Model index         | ResNet50-based Model |           |           |           |           |
|---------------------|----------------------|-----------|-----------|-----------|-----------|
|                     | 1                    | 2         | 3         | 4         | 5         |
| ResNet width factor | 0.375×               | 0.5×      | 0.5×      | 0.625×    | 0.75×     |
| token number $L$    | 128                  | 128       | 256       | 192       | 128       |
| # SA blocks         | [3,3,9,3]            | [3,3,9,9] | [3,3,9,3] | [3,3,9,3] | [3,3,9,3] |
| SA widening factor  | 4                    | 4         | 4         | 4         | 2         |

Table 5: ResNet-50 configurations. The 5 configurations correspond to the 5 curves in Fig. 8 (a) of the paper.

| Model index        | RegNet-based Model |           |           |           |           |           |
|--------------------|--------------------|-----------|-----------|-----------|-----------|-----------|
|                    | 1                  | 2         | 3         | 4         | 5         | 6         |
| RegNet size        | 400M               | 400M      | 800M      | 800M      | 1.6G      | 3.2G      |
| token number $L$   | 128                | 256       | 128       | 256       | 256       | 256       |
| # SA blocks        | [6,6,9,9]          | [3,3,9,9] | [3,3,9,6] | [3,3,9,6] | [6,6,9,6] | [6,6,9,9] |
| SA widening factor | 4                  | 4         | 4         | 4         | 2         | 4         |

Table 6: RegNet-Y configurations. The 6 configurations correspond to the 6 curves in Fig. 8 (b) of the paper.

| Model index            | MobileNet-based Model |           |           |           |           |
|------------------------|-----------------------|-----------|-----------|-----------|-----------|
|                        | 1                     | 2         | 3         | 4         | 5         |
| MobileNet width factor | 0.75×                 | 1.00×     | 1.00×     | 1.25×     | 1.5×      |
| token number $L$       | 128                   | 128       | 128       | 128       | 256       |
| # SA blocks            | [3,3,9,9]             | [3,3,9,9] | [6,6,9,9] | [6,6,9,9] | [3,3,9,9] |
| SA widening factor     | 4                     | 4         | 4         | 4         | 4         |

Table 7: MobileNet-v3 configurations. The 5 configurations correspond to the 5 curves in Fig. 9 of the paper.

| Training Config          | Dyn-Perceiver                 | Dyn-Perceiver                 |
|--------------------------|-------------------------------|-------------------------------|
|                          | MobileNet-based               | ResNet/RegNet-based           |
| optimizer                | adamW                         | adamW                         |
| base learning rate       | {1e-3, 2e-3}                  | {1e-3, 2e-3}                  |
| weight decay             | 0.05                          | 0.05                          |
| optimizer momentum       | $\beta_1, \beta_2=0.9, 0.999$ | $\beta_1, \beta_2=0.9, 0.999$ |
| batch size               | {1024, 2048}                  | {1024, 2048}                  |
| training epochs          | 600                           | 300                           |
| learning rate schedule   | cosine decay                  | cosine decay                  |
| warmup epochs            | 20                            | 20                            |
| warmup schedule          | linear                        | linear                        |
| layer-wise lr decay [1]  | None                          | None                          |
| randaugment [9]          | (9, 0.5)                      | (9, 0.5)                      |
| label smoothing [52]     | 0.1                           | 0.1                           |
| mixup [72]               | 0.8                           | 0.8                           |
| cutmix [70]              | 1.0                           | 1.0                           |
| stochastic depth [26]    | None                          | None                          |
| layer scale [55]         | None                          | None                          |
| gradient clip            | None                          | None                          |
| exp. mov. agv.(EMA) [48] | 0.9999                        | 0.9999                        |

Table 8: ImageNet-1K training settings.

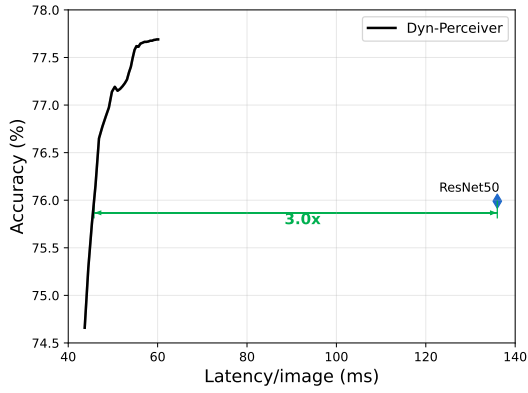

(a) CPU.

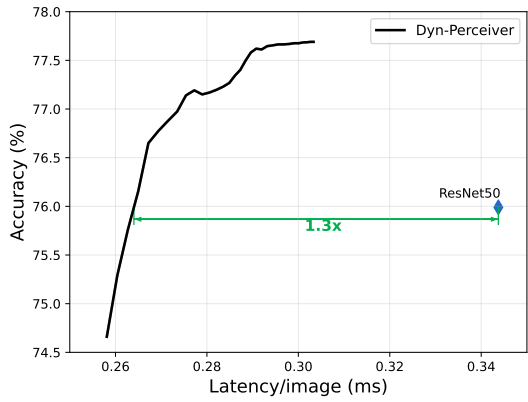

(b) GPU.

Figure 13: Speed test results of Dyn-Perceiver built on ResNet ( $0.375\times$ , model 1 in Tab. 5).
